# Supplementary material for: Flexible use of multimodal communicative strategies in adult chimpanzees (Pan troglodytes)
Source: Research Square preprint supplement (doi:10.21203/rs.3.rs-6901931/v1), 2025-07-18
Supplement: Supplementary file 1 [file 89a5d6037051b39f688eefaa.docx]

**Supplementary Material**

**Flexible use of multimodal communicative strategies in adult chimpanzees (*Pan troglodytes*)**

Angèle Lombrey, Adriana Luna, Nick Dannenmann, Katerina Harvati, Ulrich Knief, Marlen Fröhlich

Table S1: Information on group composition

| **Research setting** | **Social group** | **Number of subjects** | **Number of male subjects** | **Number of female subjects** | **Total group size** |
| --- | --- | --- | --- | --- | --- |
| Captive | A | 13 | 2 | 11 | 21 |
| B | 6 | 1 | 5 | 6 |
| L | 30 | 13 | 17 | 33 |
| Semi-wild | C2 | 29 | 8 | 21 | 56 |
| C4 | 9 | 5 | 4 | 13 |

Table S2: Subject information and sample size per subject represented by the amount of coded signal utterances

| **Subject** | **Group** | **Setting** | **Sex** | **Age** | **Rank** | **Sample size** |
| --- | --- | --- | --- | --- | --- | --- |
| Alex | B | Captive | M | 21 | 1 | 96 |
| Bambari | A | Captive | F | 21 | 5 | 64 |
| Bea | L | Captive | F | 27 | NA | 13 |
| Bobby | C4 | Sanctuary | M | 28 | NA | 38 |
| Carol | C2 | Sanctuary | F | 25 | NA | 94 |
| Coco | C2 | Sanctuary | F | 37 | NA | 30 |
| Commander | C4 | Sanctuary | M | 22 | NA | 146 |
| Corry | A | Captive | F | 45 | 7 | 240 |
| Daisy | C2 | Sanctuary | F | 17 | NA | 93 |
| David | C2 | Sanctuary | M | 20 | NA | 154 |
| Daza | B | Captive | F | 36 | 3 | 92 |
| Debbie | C2 | Sanctuary | F | 20 | NA | 139 |
| Diana | C2 | Sanctuary | F | 31 | NA | 36 |
| Diz | C2 | Sanctuary | F | 14 | NA | 81 |
| Dolly | C2 | Sanctuary | F | 25 | NA | 277 |
| Donald | L | Captive | M | 28 | NA | 53 |
| Dora | C2 | Sanctuary | F | 33 | NA | 139 |
| Dorien | A | Captive | F | 41 | 6 | 50 |
| Doug | C2 | Sanctuary | M | 19 | NA | 92 |
| Espe | L | Captive | F | 31 | NA | 104 |
| Fetz | L | Captive | M | 16 | NA | 53 |
| Fraukje | A | Captive | F | 45 | 9 | 75 |
| Freddy | L | Captive | M | 35 | NA | 20 |
| Frederike | B | Captive | F | 48 | 5 | 26 |
| Frodo | A | Captive | M | 28 | 1 | 146 |
| Garibal | L | Captive | M | 26 | NA | 29 |
| Gartenzwerg | L | Captive | F | 39 | NA | 107 |
| Girlie | L | Captive | F | 18 | NA | 34 |
| Gregor | L | Captive | M | 33 | NA | 81 |
| Heronemo | L | Captive | M | 37 | NA | 12 |
| Hope | B | Captive | F | 31 | 2 | 33 |
| Ignaz | L | Captive | M | 33 | NA | 28 |
| Jack | C4 | Sanctuary | M | 13 | NA | 154 |
| Jacky | L | Captive | F | 52 | NA | 10 |
| Jeudi | B | Captive | F | 56 | 4 | 39 |
| John | C2 | Sanctuary | M | 15 | NA | 93 |
| Judy | C2 | Sanctuary | F | 26 | NA | 103 |
| Kamboo | C4 | Sanctuary | F | 26 | NA | 24 |
| Kathy | C4 | Sanctuary | F | 23 | NA | 73 |
| Kisha | A | Captive | F | 18 | 8 | 85 |
| Lindi | L | Captive | F | 26 | NA | 22 |
| Little Jane | C2 | Sanctuary | F | 37 | NA | 232 |
| Little Jenkins | C4 | Sanctuary | F | 15 | NA | 31 |
| Lutz | L | Captive | M | 18 | NA | 29 |
| Maggie | C2 | Sanctuary | F | 36 | NA | 62 |
| Maja | A | Captive | F | 35 | 10 | 212 |
| Malia | L | Captive | F | 16 | NA | 52 |
| Mary | C4 | Sanctuary | F | 16 | NA | 20 |
| Masya | C2 | Sanctuary | F | 31 | NA | 57 |
| MaxC | C2 | Sanctuary | M | 15 | NA | 49 |
| MaxL | L | Captive | M | 26 | NA | 52 |
| Mickey | C2 | Sanctuary | M | 34 | NA | 111 |
| Misha | C2 | Sanctuary | F | 34 | NA | 102 |
| Moyo | C2 | Sanctuary | M | 14 | NA | 95 |
| Nana | L | Captive | F | 26 | NA | 56 |
| Natascha | A | Captive | F | 41 | 5 | 59 |
| Negine | L | Captive | F | 22 | NA | 16 |
| Nikki | C2 | Sanctuary | F | 24 | NA | 74 |
| Nina | C2 | Sanctuary | F | 19 | NA | 68 |
| Noel | C2 | Sanctuary | F | 45 | NA | 84 |
| Pan | C2 | Sanctuary | M | 33 | NA | 64 |
| Panya | L | Captive | F | 16 | NA | 18 |
| Para | L | Captive | F | 24 | NA | 49 |
| Paul | L | Captive | M | 31 | NA | 30 |
| Paulinchen | L | Captive | F | 34 | NA | 38 |
| Pippa | C2 | Sanctuary | F | 33 | NA | 113 |
| Pitch | L | Captive | F | 26 | NA | 20 |
| Riet | A | Captive | F | 44 | 3 | 42 |
| Robert | A | Captive | M | 46 | 2 | 25 |
| Sandra | A | Captive | F | 28 | 5 | 114 |
| Scholzi | L | Captive | F | 35 | NA | 39 |
| Scholzon | L | Captive | M | 23 | NA | 30 |
| Sinkie | C4 | Sanctuary | M | 28 | NA | 41 |
| Swela | A | Captive | F | 26 | 7 | 228 |
| Tai | A | Captive | F | 19 | 4 | 142 |
| Tess | C2 | Sanctuary | F | 23 | NA | 224 |
| Tilly | C2 | Sanctuary | F | 21 | NA | 182 |
| Toto | L | Captive | M | 42 | NA | 32 |
| Trixie | C2 | Sanctuary | F | 32 | NA | 75 |
| Val | C4 | Sanctuary | M | 22 | NA | 195 |
| Violet | C2 | Sanctuary | F | 31 | NA | 189 |
| Vis | C2 | Sanctuary | M | 18 | NA | 60 |
| Wazlaw | L | Captive | M | 31 | NA | 40 |
| Zicklein | L | Captive | F | 23 | NA | 39 |
| Zina | L | Captive | F | 18 | NA | 35 |
| Zira | B | Captive | F | 24 | 3 | 34 |
| Zora | L | Captive | F | 13 | NA | 70 |


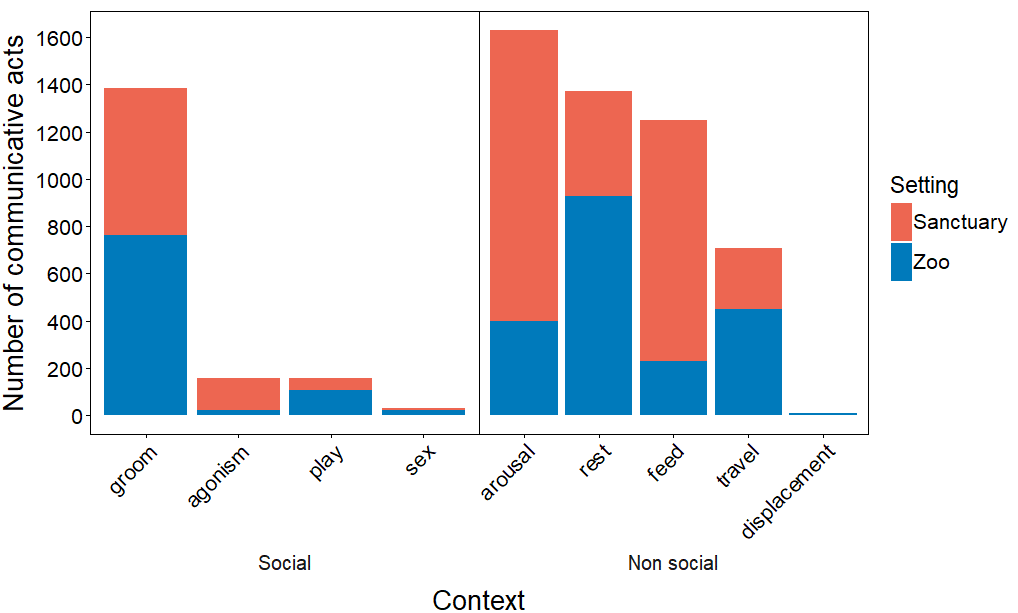


*Figure S1: Distribution of the communicative acts across the nine social contexts recorded. Bars represent the number of communicative acts recorded in each research setting.*

Table S3: Definition of the modifiers used in the BORIS coding scheme (S: signaller; R: recipient)

| **Modifier** | **Definition** |
| --- | --- |
| **Social context** | Behaviour of S just before the emission of the signal |
| agonism | S is engaged in a conflict with either R or other individuals |
| arousal | S is excited and/or stressed out, often showed by loud vocalizations and/or emotional running |
| displacement | S expresses stereotypical behaviours |
| feed | S is eating or being fed |
| groom | S is grooming or being groomed by R or another individual |
| play | S is engaged in a play session |
| sex | S is having sex |
| travel | S is travelling over a long distance |
| rest | S is steady or self-grooming |
| other |  |
| NA | unknown due to poor visibility |
| **Sensory channel** | Sensory channel through which the signal is perceived by R (multiple choice) |
| Auditory | S's behaviour produces a sound and is perceived through hearing |
| Visual | S's behaviour is perceived via eye sight |
| Seismic | S's behaviour is perceived through substrate movement |
| Tactile | S's behaviour is perceived through body contact |
| **Co-occurring signal types** | Combination with another signal type (multiple choice) |
| no | no |
| yes - plus facial | combination with facial expression |
| yes - plus facial fixed | obligatory combination with facial expression |
| yes - plus manual | combination with manual gesture |
| yes - plus body | combination with bodily, non-manual gesture |
| yes - plus vocal | combination with vocalization |
| yes - plus vocal fixed | obligatory combination with vocalization |
| NA | unknown due to poor visibility |
| **Social goal** | Apparent aim of S, as evident by cease of communication and previous behaviour |
| Acquire object | R gives signaller object, e.g. food item |
| Attend to spec location | R adjusts behaviour to focus attention on indicated location |
| Climb on me | R (infant) climbs on signaller’s body |
| Dominance | R acknowledges that S is higher ranking |
| Affiliation/greeting | R reacts in an apparently affiliative way |
| Follow me - sex | R follows S, usually in consortship |
| Move away | R moves away from signaller |
| Move closer | R moves closer to signaller |
| Sexual attention | R responds sexually |
| Seek reassurance | S want R to reassure them |
| Give reassurance | S want R to calm down |
| Reposition body | R moves (and hold) body into indicated position |
| Start grooming | S wants R to groom them |
| Start play | play between signaller and recipient |
| Stop action | R either ceases current behaviour or change behaviour to direct it toward another individual |
| Travel with me | R travels together with S |
| Tolerance | S signals in a submissive way, no particular behavioural outcome is looked for |
| Other |  |
| NA | unknown |
| **Response** | Response of R in reaction to S's behaviour |
| none | No response or ignorance by R |
| Social goal | R responds in a way that seems appropriate to S's signal |
| responds with visual attention only | R looks at S (but no other response) |
| behavioural response - signal | R responds with a signal - "negotiation”; ≠ from a signal-like response produced as an automatic reaction to S's signal |
| behavioural response - move away | R moves away from S |
| behavioural response - aggressive | R reacts in an aggressive or agonistic way to S's signal |
| NA | Not clearly visible, unknown |
| **Recipient** | Recipient ID  Single choice: only dyadic communicative acts are considered - broad behaviour (e.g. vocalizations) for which one precise recipient cannot be identified are not included |

Table S4: Distribution of signal cases across different groups, contexts and communicative strategies

|  | **Social Groups** | | | | | **Context** | |
| --- | --- | --- | --- | --- | --- | --- | --- |
|  | **Group A** | **Group B** | **Group C2** | **Group C4** | **Group L** | **Non-social** | **Social** |
| **Multicomponent communicative acts** | | | | | | | |
| **Non MC** | 1194 | 270 | 2305 | 627 | 971 | 3822 | 1545 |
| **MC** | 209 | 46 | 709 | 44 | 118 | 967 | 159 |
| **Multisensory communicative acts** | | | | | | | |
| **Non MS** | 748 | 216 | 1569 | 442 | 752 | 2673 | 1054 |
| **MS** | 660 | 100 | 1444 | 232 | 355 | 2138 | 653 |

Table S5: Fixed effects estimates from the random intercept models (including Subject ID as a random effect) for both communicative strategies

| Fixed effects | Estimate | Std. Error | Z value | Pr |
| --- | --- | --- | --- | --- |
| **Multicomponent acts** | | | | |
| (Intercept) | - 2.721 | 0.346 | - 7.860 | 3.84e-15 *** |
| Age | 0.066 | 0.073 | 0.899 | 0.369 |
| SexM | - 0.337 | 0.162 | - 2.084 | 0.037 * |
| SettingSanctuary | 0.497 | 0.176 | 2.824 | 0.005 *** |
| ContextSocial | 0.346 | 0.124 | 2.781 | 0.005 *** |
| RecAttentionState_YNT | 0.149 | 0.134 | 1.115 | 0.265 |
| **Multisensory acts** | | | | |
| (Intercept) | - 3.341 | 0.309 | - 10. 814 | <2e-16 *** |
| Age | 0.077 | 0.057 | 1.345 | 0.179 |
| SexM | - 0.080 | 0.126 | - 0.632 | 0.527 |
| SettingSanctuary | 0.293 | 0.132 | 2.219 | 0.027 * |
| ContextSocial | 0.189 | 0.097 | 1.942 | 0.052 |
| RecAttentionState_YNT | 2.815 | 0.132 | 21.296 | <2e-16 *** |

Table S6: BRN model comparison estimates for both communicative strategies (ri = random intercept model; ris = random intercept and slope model)

| Model | npar | AIC | BIC | logLik | deviance | Chisq | Df | Pr |
| --- | --- | --- | --- | --- | --- | --- | --- | --- |
| **Multicomponent acts** | | | | | | | | |
| ri | 9 | 5041.326 | 5102.332 | -2511.663 | 5023.326 | NA | NA | NA |
| ris | 12 | 5046.031 | 5127.372 | -2511.015 | 5022.031 | 1.295 | 3 | 0.730 |
| **Multisensory acts** | | | | | | | | |
| ri | 9 | 7437.807 | 7498.847 | -3709.904 | 7419.807 | NA | NA | NA |
| ris | 12 | 7399.303 | 7480.689 | -3687.651 | 7375.303 | 44.505 | 3 | 1.179e-09 |
